# Supplementary material
Source: Springer Nature journal article supplement (https://www.springermedizin.de/resource/supplementary/12889_2009_2036_MOESM1_ESM.pdf/9484390)

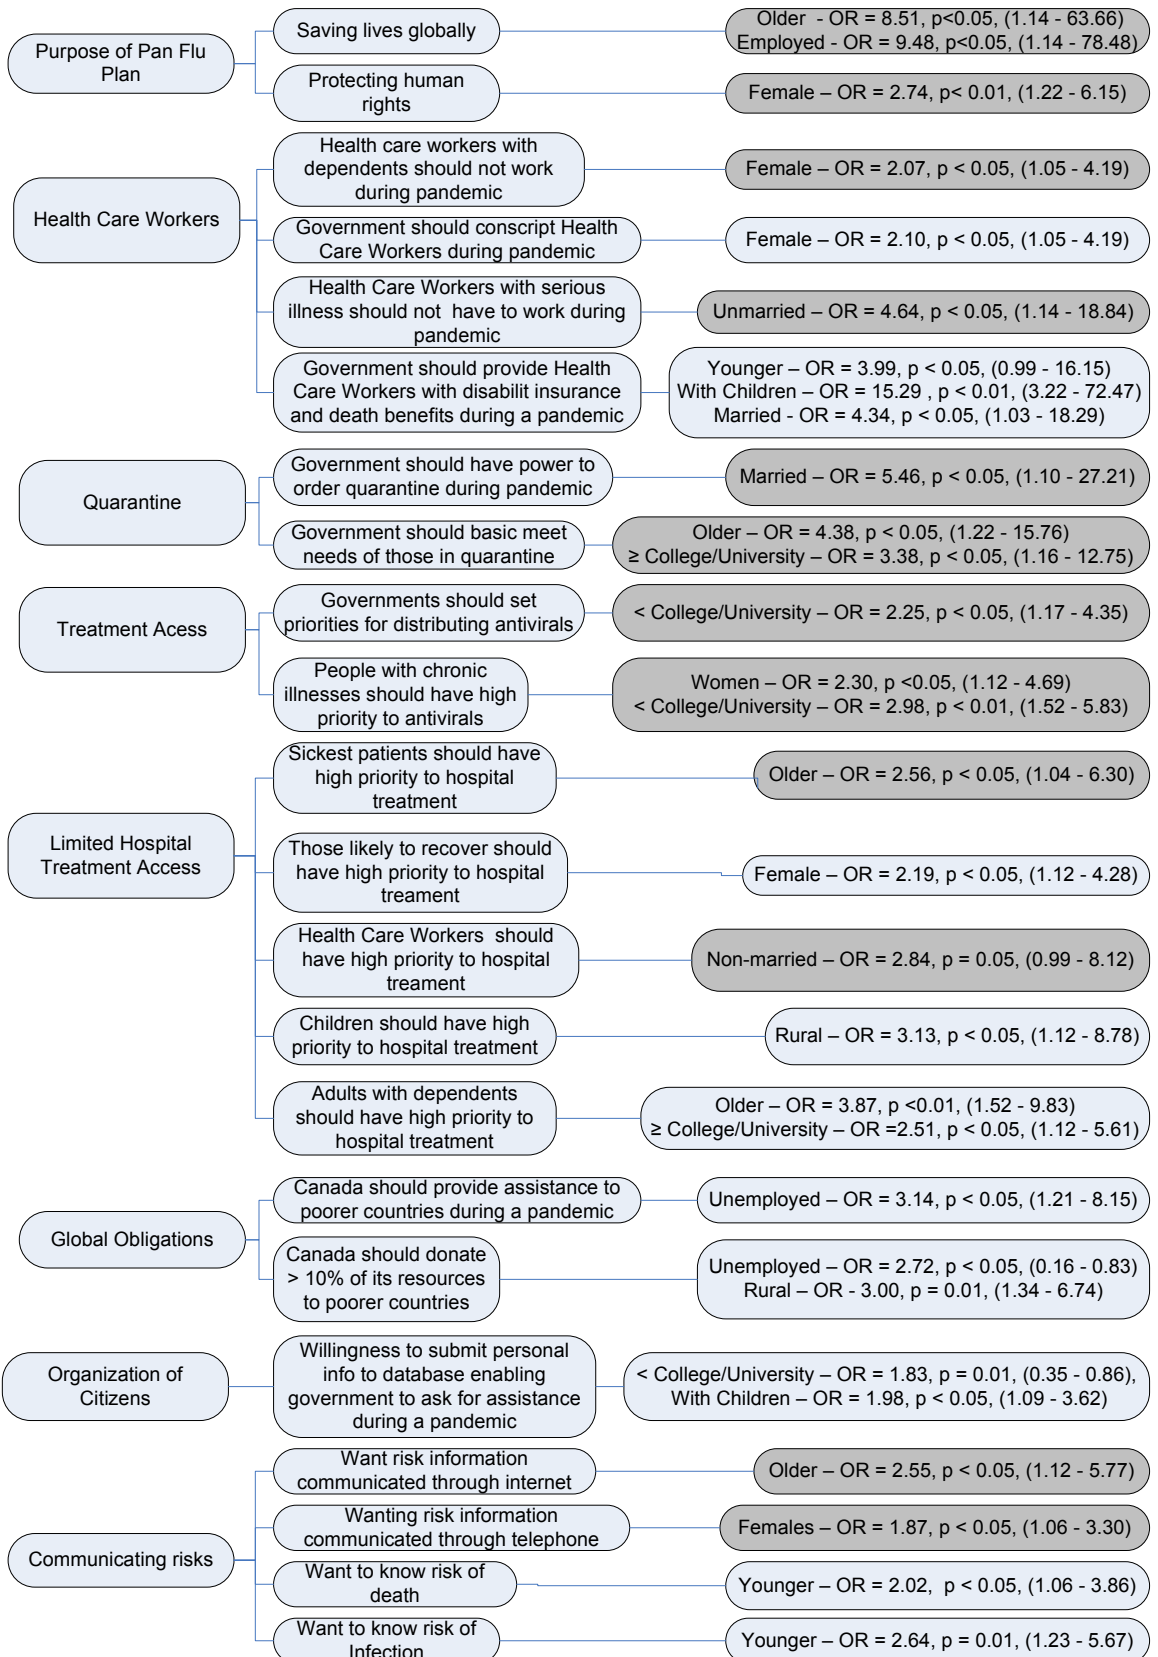

Supplement: MOESM1 [file 9484390]
